# Supplementary material
Source: publisher figshare collection journal article supplement (https://asha.figshare.com/ndownloader/files/31914644)
Supplement: Supplementary file 1 [file 31914644]

**Supplemental Material S1.** Survey: IDDSI implementation in Upstate New York.

1. Do you consent?
  - a. Yes
  - b. No. (If no, end survey)
2. In which type of facility do you work?
  - a. Hospital
  - b. Nursing home
  - c. SNF
  - d. Group home
  - e. Rehab center
  - f. Other (please specify)
3. What is your role in the facility?
  - a. Administrator
  - b. Dietician
  - c. SLP
  - d. Food Service Worker
  - e. Nurse
  - f. Direct Care
  - g. Other (please specify)
4. How serious of a health problem do you think dysphagia is in long-term care facilities?
  - a. Not a problem at all
  - b. A mild issue that affects few patients
  - c. A moderate issue that affects many patients
  - d. A moderately-severe issue that affects a majority of patients
  - e. A severe issue that affects nearly all patients
5. What terminologies does your facility currently use for different levels of drink thicknesses? (Open ended question)
6. What terminologies does your facility currently use for different food textures? (pen ended question)
7. Are you aware if this terminology is consistent/standardized across facilities?
  - a. Yes
  - b. No
  - c. Unsure
8. Do you think a standardized dysphagia diet would improve patient health and safety?
  - a. Yes
  - b. No
  - c. Unsure
9. Why do you or don't you think that a standardized dysphagia diet would help improve patient health and safety? (Open ended question)

10. Have you ever heard of the International Dysphagia Diet Standardization Initiative (IDDSI)?
  - a. Yes
  - b. No. If no, skip to question 16.
11. Where have you heard about IDDSI? (Open ended question)
12. When is IDDSI supposed to be implemented in the US? (Open ended question)
13. Are you aware of any plans in your facility to implement IDDSI?
  - a. Yes
  - b. No. If no, skip to question 19.
14. If yes, can you explain the implementation plan in your own words? (Open ended question)
15. If yes, what is the time frame for implementation? (Open ended question)
16. Are you aware that IDDSI had provided resources for facilities to use to implement the diet standards?
  - a. Yes
  - b. No
17. Please follow the link to view some examples of the resources IDDSI has made available to the public for implementation: <https://iddsi.org/resources>
  - a. Yes, I looked at the resoruces and I'm ready to answer the next question
18. Would you feel confident implementing IDDSI using the resources provided?
  - a. Yes
  - b. No
19. What do you think would be the biggest barrier to implementing this new program?
  - a. Financial
  - b. Number of staff
  - c. Training
  - d. Time constraints
  - e. Communication
  - f. Other (please specify)
20. Is there anything that you think would facilitate implementation? (funding, increased staffing, better communication.....)
  - a. Yes
  - b. No
21. Please explain your answer to the previous question. (Open ended question)
22. Thank you for participating in this survey. Is there any other pertinent information or opinions you would like to share regarding dysphagia management or dysphagia diet standardization? (Open ended question)
